# Supplementary material
Source: Springer Nature journal article supplement (https://www.springermedizin.de/resource/supplementary/12943_2009_477_MOESM6_ESM.pdf/9554388)

**A**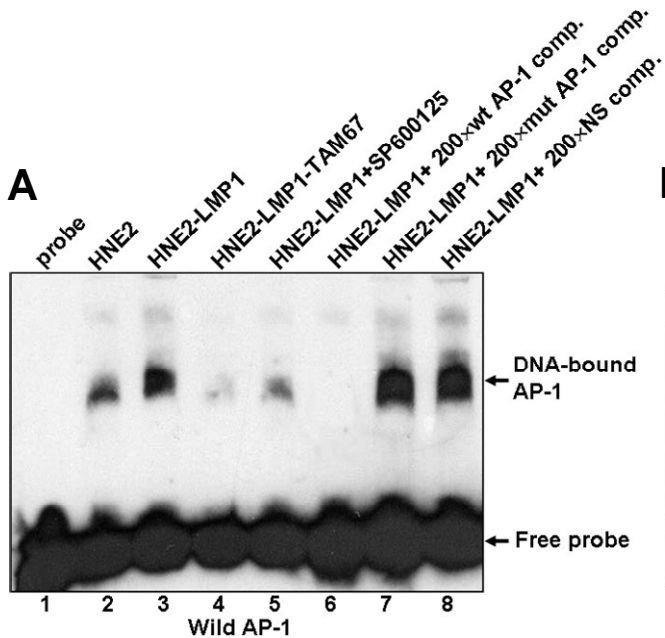**B**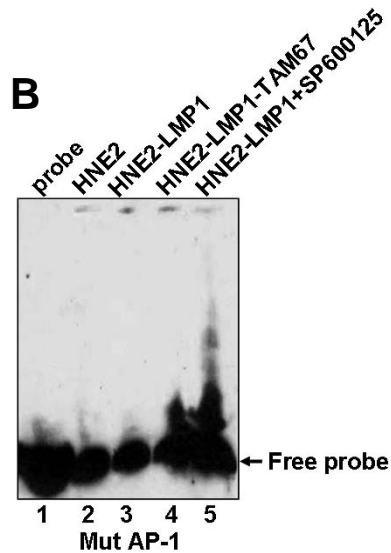**C**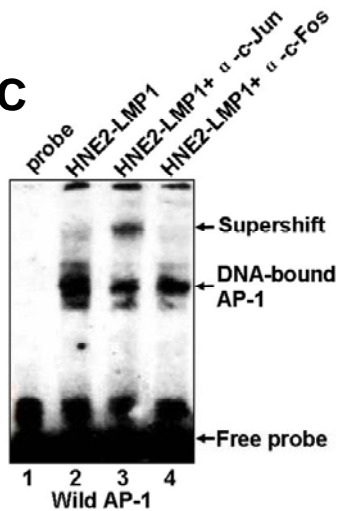**D**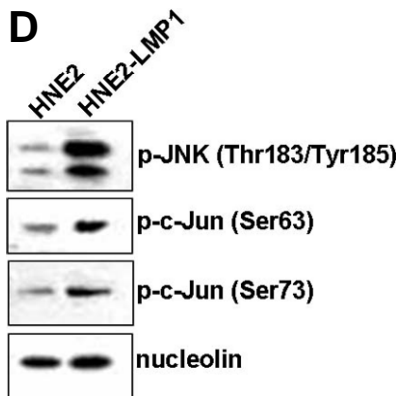**E**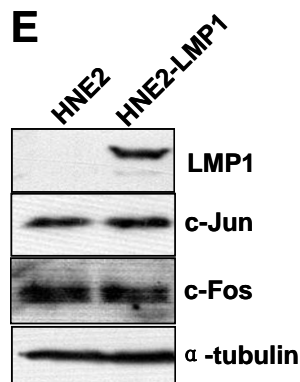

Supplement: MOESM6 [file 9554388]
